# Supplementary material for: Computer-Based Driving in Dementia Decision Tool With Mail Support: Cluster Randomized Controlled Trial
Source: PubMed Central journal article supplement (PMC5993977; doi:10.2196/jmir.9126), 2018-05-25
Supplement: jmir_v20i5e194_app8.pdf [file jmir_v20i5e194_app8.pdf]

Multimedia Appendix 8. Tool recommendations compared with participant action

| Intervention Group<br>n=114 observations | Participant<br>Reported<br>n (%) | Participant Did<br>Not Report<br>n (%) |
|------------------------------------------|----------------------------------|----------------------------------------|
| Tool Recommendation: Report              | 32 (28%)                         | 8 (7%)                                 |
| Tool Recommendation: No Consensus        | 25 (22%)                         | 34 (30%)                               |
| Tool Recommendation: Do Not Report       | 1 (1%)                           | 14 (12%)                               |

| Control Group<br>n=103 observations | Participant<br>Reported<br>n (%) | Participant Did<br>Not Report<br>n (%) |
|-------------------------------------|----------------------------------|----------------------------------------|
| Tool Recommendation: Report         | 36 (35%)                         | 8(8%)                                  |
| Tool Recommendation: No Consensus   | 14 (14%)                         | 23 (22%)                               |
| Tool Recommendation: Do Not Report  | 1 (1%)                           | 21 (20%)                               |
